# Supplementary material for: Graphene oxide with covalently linked porphyrin antennae: Synthesis, characterization and photophysical properties
Source: Royal Society of Chemistry journal article supplement (doi:10.1039/c0jm00991a), 2010-10-04
Supplement: c0jm00991a.pdf [file c0jm00991a.pdf]

# Electronic Supplementary Information

## Graphene Oxide with Covalently Linked Porphyrin Antennae: Synthesis, Characterization and Photophysical Properties.

*Nikolaos Karousis,<sup>a</sup> Atula S. D. Sandanayaka,<sup>b</sup> Taku Hasobe,<sup>\*c</sup> Solon P. Economopoulos,<sup>a</sup> Evangelia Sarantopoulou<sup>a</sup> and Nikos Tagmatarchis<sup>\*a</sup>*

<sup>a</sup> Theoretical and Physical Chemistry Institute, National Hellenic Research Foundation, 48 Vassileos Constantinou Avenue, 116 35 Athens, Greece.

<sup>b</sup> School of Materials Science, Japan Advanced Institute of Science and Technology (JAIST), Nomi, Ishikawa 923-1292, Japan.

<sup>c</sup> Department of Chemistry, Faculty of Science and Technology, Keio University, Yokohama 223-8522, Japan, and PRESTO, Japan, Science and Technology Agency (JST), 4-1-8 Honcho, Kawaguchi, Saitama, 332-0012, Japan.

[tagmatar@eie.gr](mailto:tagmatar@eie.gr) (N. Tagmatarchis) [hasobe@chem.keio.ac.jp](mailto:hasobe@chem.keio.ac.jp) (T. Hasobe)

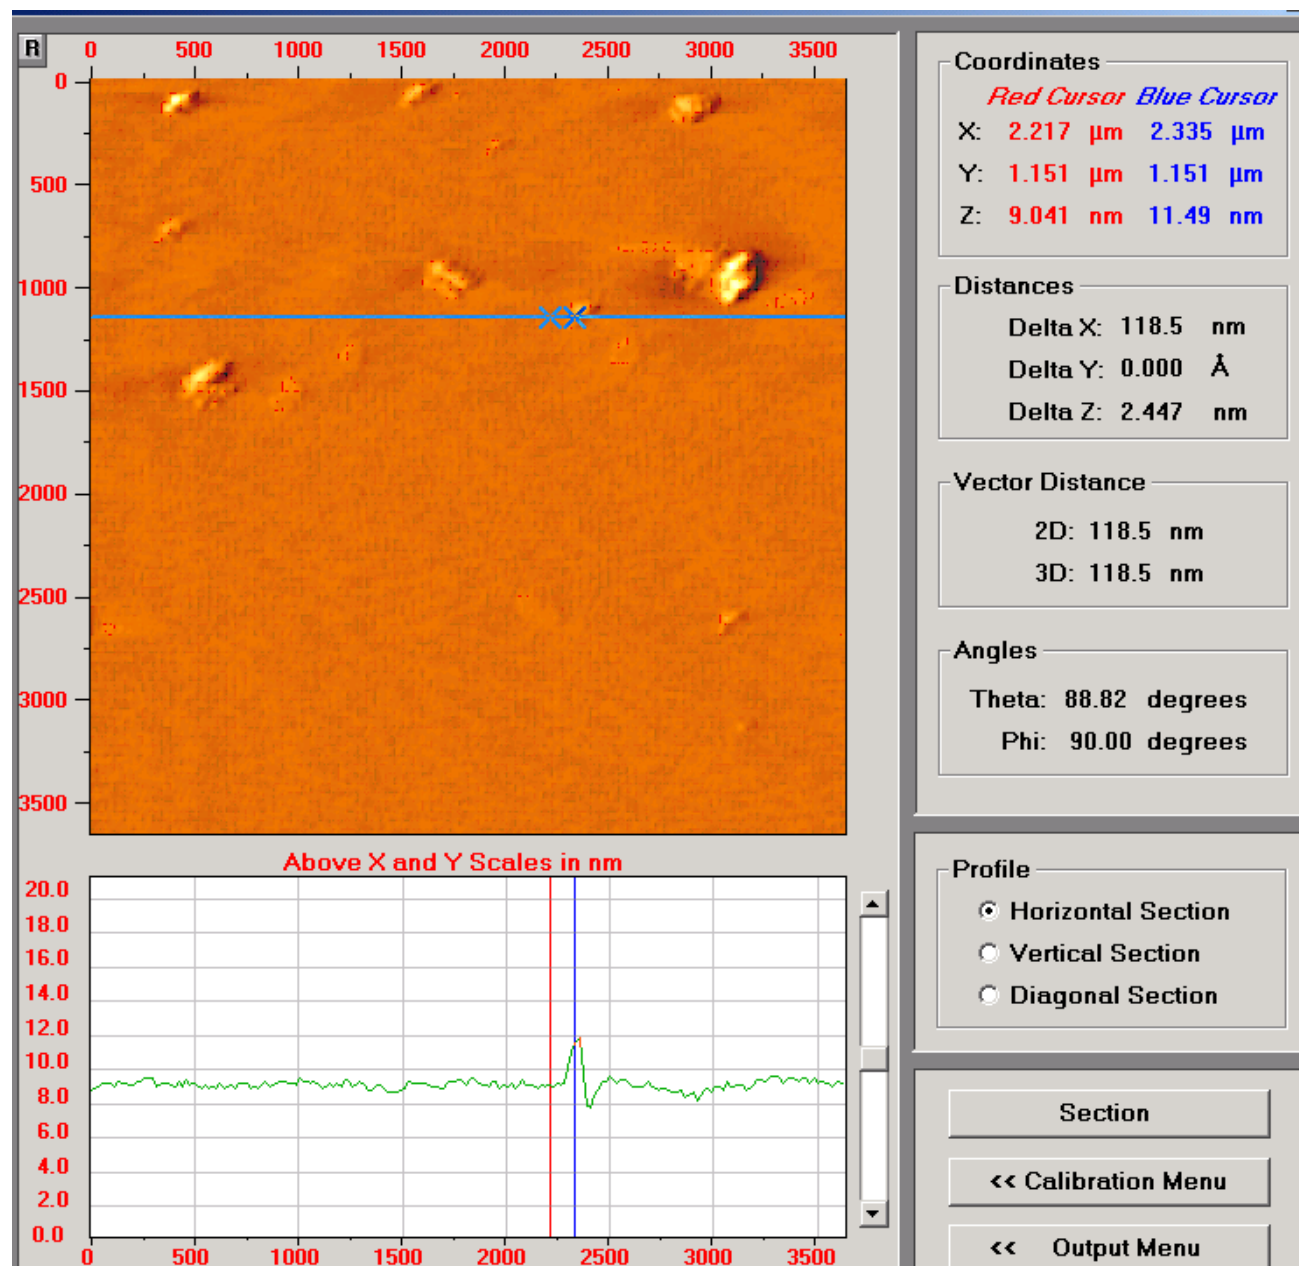

**Fig. S1.** AFM image of graphene-H<sub>2</sub>P and profile analysis showing the height for a specific region.

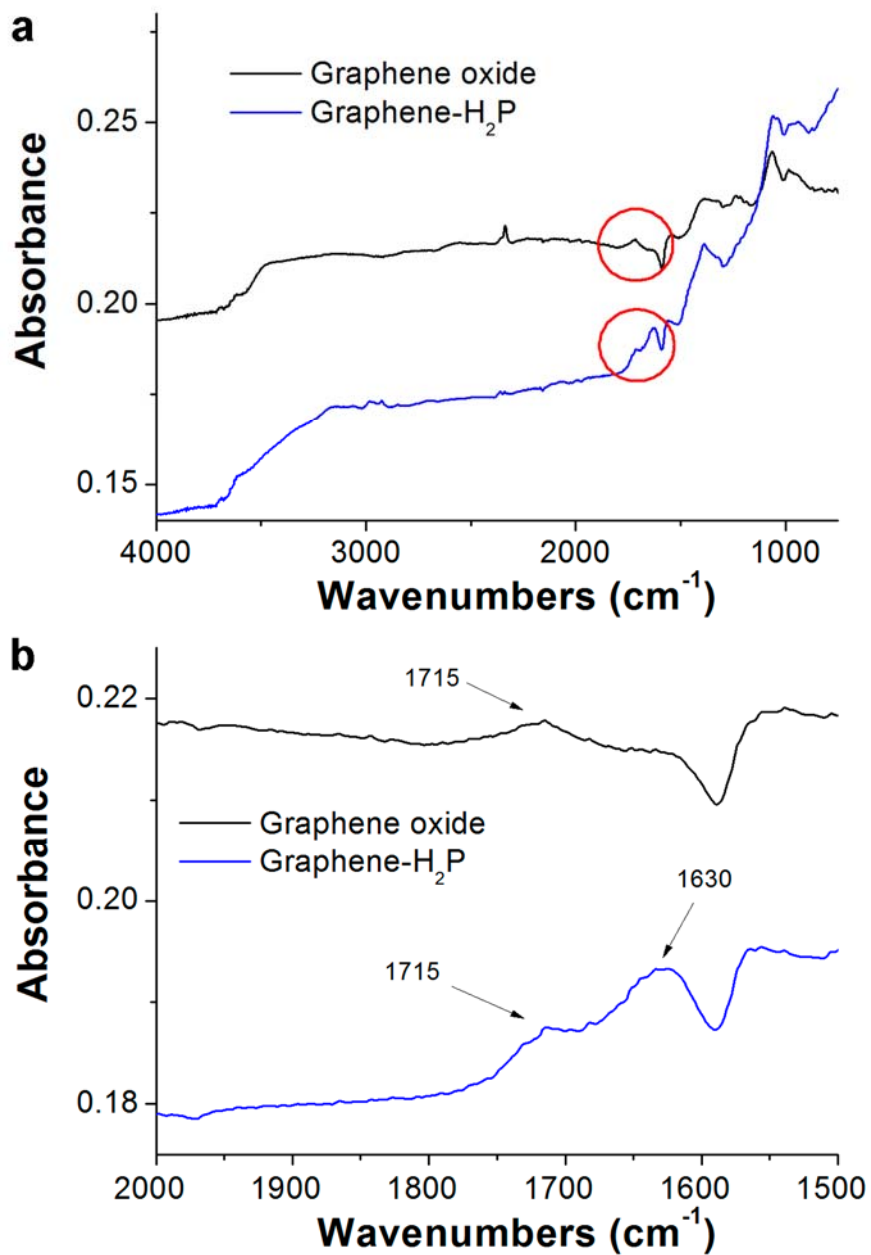

**Fig. S2.** a) ATR-IR spectra of graphene oxide (black) and graphene- $\text{H}_2\text{P}$  (blue) and b) enlarged area of 1500 – 2000  $\text{cm}^{-1}$  of graphene oxide (black) and graphene- $\text{H}_2\text{P}$  (blue).

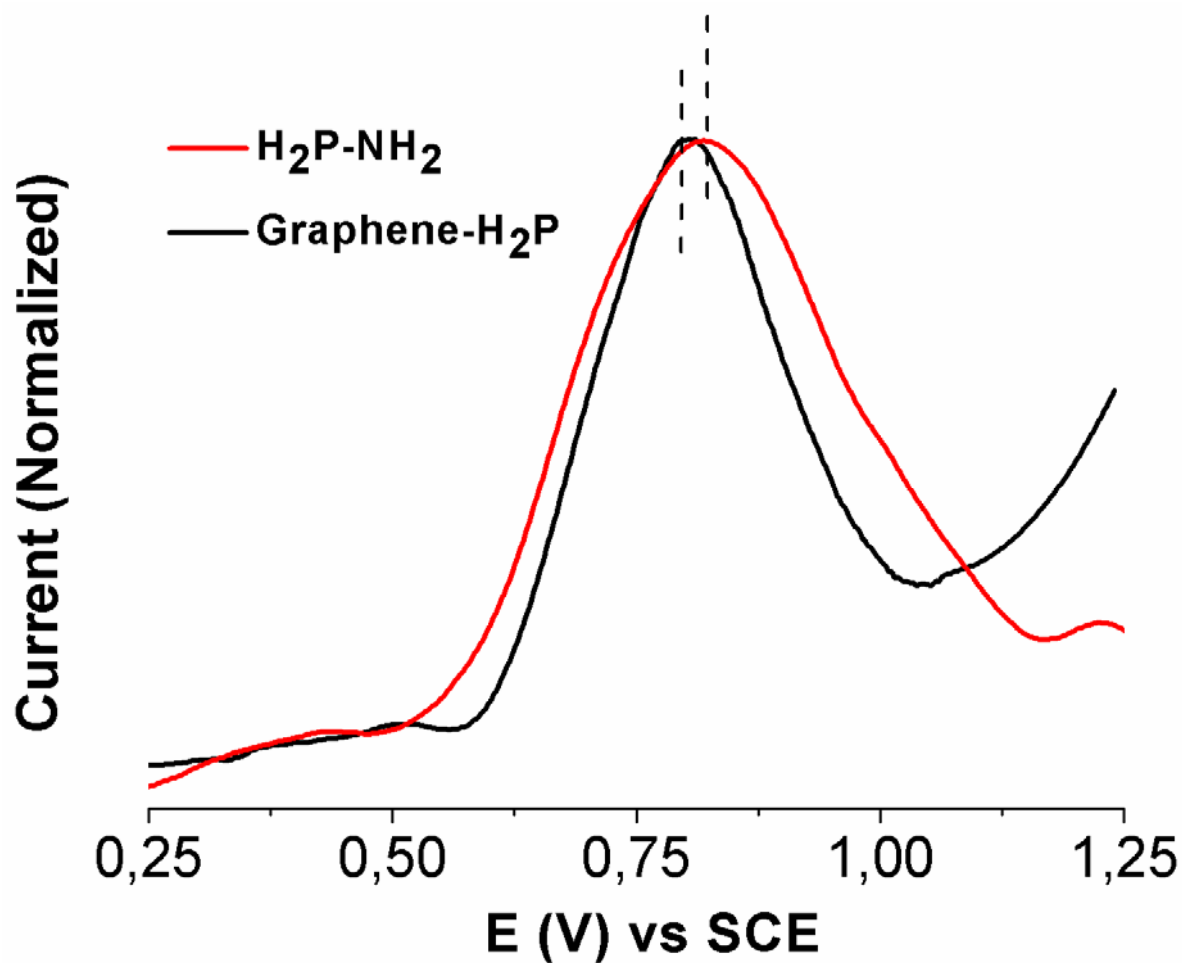

**Fig. S3.** Differential pulsed voltammogram of the oxidations of graphene- $\text{H}_2\text{P}$  (black) and free  $\text{H}_2\text{P-NH}_2$  (red), obtained in DMF.

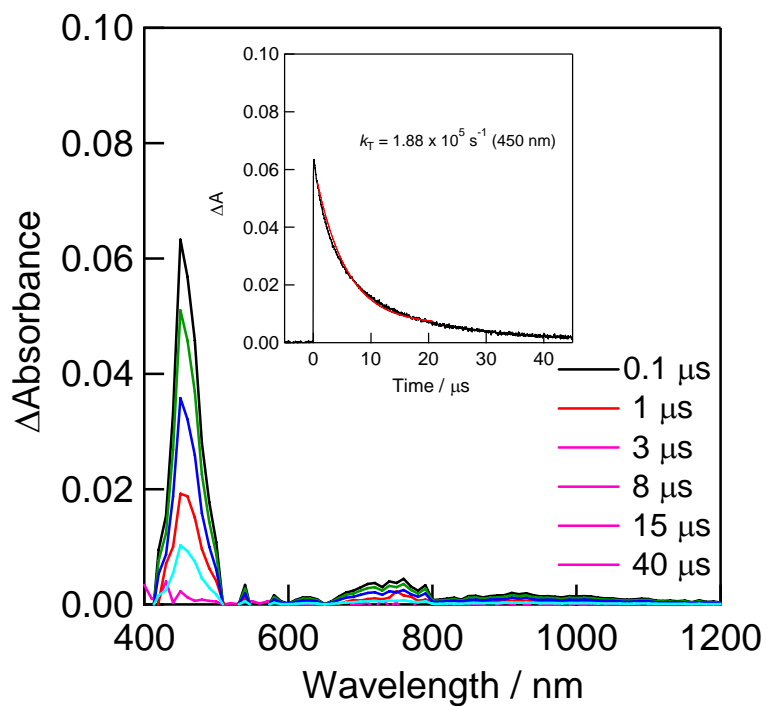

**Fig. S4.** Nanosecond transient absorption spectra of H<sub>2</sub>P-NH<sub>2</sub> observed by 532 nm (ca. 1 mJ/ pulse) laser irradiation on film. Inset: Absorption-time profiles.

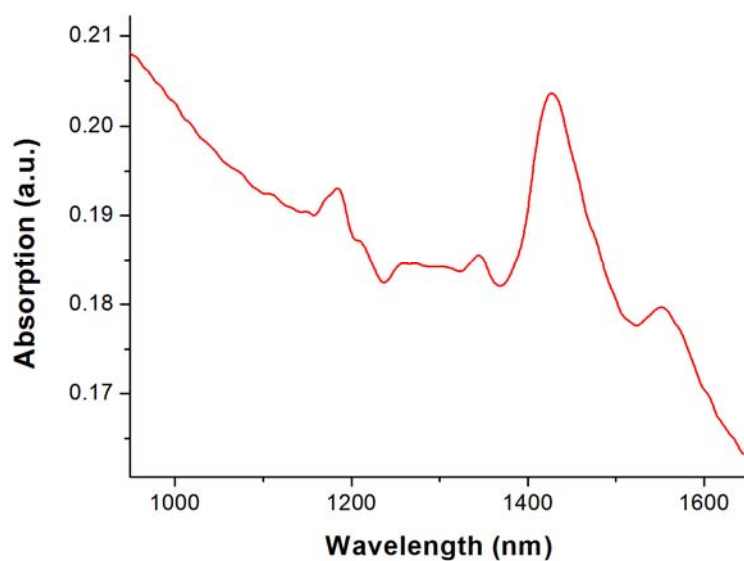

**Fig. S5.** Absorption spectrum of electrochemically reduced graphene oxide at -2 Volt, in DMF, with  $\text{Bu}_4\text{NPF}_6$  as electrolyte. Working, pseudo-reference and counter electrodes: Pt wire.

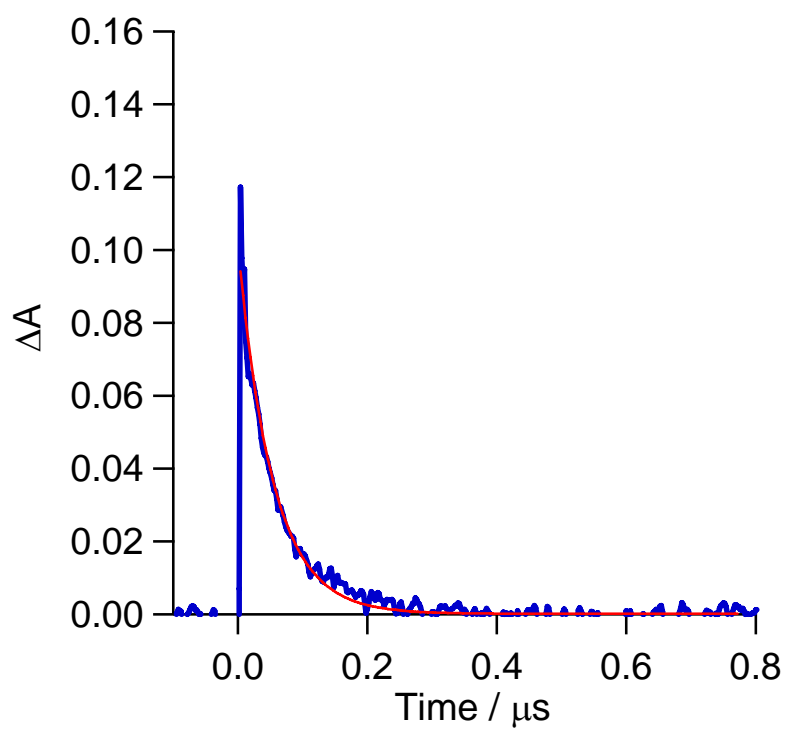

**Fig. S6.** Absorption-time profiles of GO-H<sub>2</sub>P at 1300 nm.

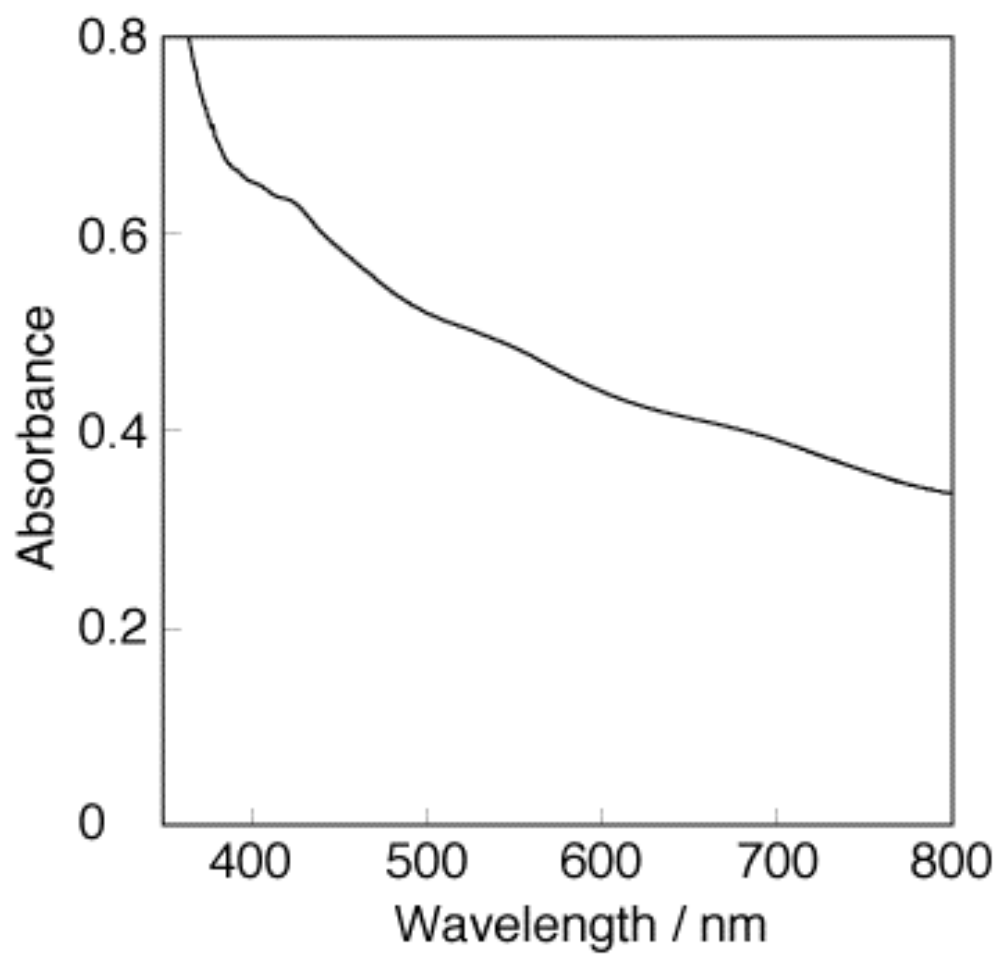

**Fig. S7.** Absorption spectrum of OTE/SnO<sub>2</sub>/graphene-H<sub>2</sub>P.
